# Supplementary material for: Cisplatin resistance in cell models: evaluation of metallomic and biological predictive biomarkers to address early therapy failure
Source: Royal Society of Chemistry journal article supplement (doi:10.1039/c7mt00014f), 2017-01-01
Supplement: c7mt00014f1.pdf [file c7mt00014f1.pdf]

Supplementary Table 1. Prediction analysis. Single linear regression data with viability and apoptosis as dependent variables.

| <b>A.-ALL CELL LINES</b>          |                             |               |                      |               |                |               |                  |
|-----------------------------------|-----------------------------|---------------|----------------------|---------------|----------------|---------------|------------------|
| Model                             |                             | B Slope       | Confidence intervals |               | R <sup>2</sup> | F Anova       | p-value<br>Anova |
| dependent vs independent variable |                             |               | 95%                  |               |                |               |                  |
| <b>Dependent variable</b>         | <b>Independent variable</b> |               |                      |               |                |               |                  |
| Viability                         | Concentration               | -1.301        | -2.265               | -0.338        | 0.375          | 8.392         | 0.012            |
|                                   | Intracellular Pt AT-0       | -1.349        | -1.851               | -0.847        | 0.703          | 33.217        | 0.000            |
|                                   | Intracellular Pt AT-1       | -3.790        | -5.546               | -2.034        | 0.605          | 21.435        | 0.000            |
|                                   | Adducts AT-0                | -0.821        | -1.108               | -0.535        | 0.730          | 37.910        | 0.000            |
|                                   | <b>Adducts AT-1</b>         | <b>-0.624</b> | <b>-0.840</b>        | <b>-0.408</b> | <b>0.733</b>   | <b>38.356</b> | <b>0.000</b>     |
|                                   | % Tail DNA AT-0             | -3.316        | -12.994              | 6.362         | 0.037          | 0.540         | 0.474            |
|                                   | % Tail DNA AT-1             | -8.831        | -17.465              | -0.198        | 0.256          | 4.813         | 0.046            |
|                                   | % G1 phase cells            | 0.246         | -0.248               | 0.740         | 0.076          | 1.145         | 0.303            |
|                                   | % S phase cells             | -0.455        | -1.180               | 0.270         | 0.115          | 1.815         | 0.199            |
|                                   | % G2 phase cells            | -0.061        | -0.662               | 0.541         | 0.003          | 0.047         | 0.832            |
| Apoptosis                         | Concentration               | 0.847         | -0.252               | 1.947         | 0.163          | 2.730         | 0.121            |
|                                   | Intracellular Pt AT-0       | 0.419         | -0.459               | 1.296         | 0.070          | 1.046         | 0.324            |
|                                   | Intracellular Pt AT-1       | 1.266         | -1.392               | 3.925         | 0.069          | 1.044         | 0.324            |
|                                   | Adducts AT-0                | 0.674         | 0.292                | 1.056         | 0.505          | 14.293        | 0.002            |
|                                   | <b>Adducts AT-1</b>         | <b>0.600</b>  | <b>0.373</b>         | <b>0.827</b>  | <b>0.697</b>   | <b>32.139</b> | <b>0.000</b>     |
|                                   | % tail DNA AT-0             | -2.695        | -12.302              | 6.912         | 0.025          | 0.362         | 0.557            |
|                                   | % tail DNA AT-1             | 1.859         | -7.957               | 11.675        | 0.012          | 0.165         | 0.691            |
|                                   | % G1 phase cells            | 0.277         | -0.204               | 0.759         | 0.098          | 1.527         | 0.237            |

|                                 |                       |               |               |               |              |               |              |
|---------------------------------|-----------------------|---------------|---------------|---------------|--------------|---------------|--------------|
|                                 | % S phase cells       | -0.042        | -0.802        | 0.718         | 0.001        | 0.014         | 0.907        |
|                                 | % G2 phase cells      | -0.356        | -0.915        | 0.203         | 0.118        | 1.867         | 0.193        |
| <b>B.- SENSITIVE CELL LINES</b> |                       |               |               |               |              |               |              |
| Viability                       | Concentration         | -1.777        | -2.508        | -1.046        | 0.746        | 29.343        | 0.000        |
|                                 | Intracellular Pt AT-0 | -1.201        | -1.757        | -0.645        | 0.698        | 23.154        | 0.001        |
|                                 | Intracellular Pt AT-1 | -3.703        | -5.314        | -2.095        | 0.725        | 26.304        | 0.000        |
|                                 | Adducts AT-0          | -0.744        | -1.060        | -0.428        | 0.733        | 27.508        | 0.000        |
|                                 | <b>Adducts AT-1</b>   | <b>-0.561</b> | <b>-0.802</b> | <b>-0.320</b> | <b>0.729</b> | <b>26.900</b> | <b>0.000</b> |
|                                 | % Tail DNA AT-0       | -1.037        | -12.666       | 10.592        | 0.004        | 0.039         | 0.846        |
|                                 | % Tail DNA AT-1       | -8.378        | -17.248       | 0.493         | 0.307        | 4.428         | 0.062        |
|                                 | % G1 phase cells      | 0.367         | -0.155        | 0.889         | 0.197        | 2.457         | 0.148        |
|                                 | % S phase cells       | -0.402        | -1.162        | 0.357         | 0.122        | 1.395         | 0.265        |
|                                 | % G2 phase cells      | -0.214        | -0.873        | 0.444         | 0.050        | 0.525         | 0.485        |
| Apoptosis                       | Concentration         | 1.125         | -0.301        | 2.551         | 0.236        | 3.089         | 0.109        |
|                                 | Intracellular Pt AT-0 | 0.296         | -0.824        | 1.417         | 0.034        | 0.347         | 0.569        |
|                                 | Intracellular Pt AT-1 | 1.092         | -2.273        | 4.456         | 0.050        | 0.523         | 0.486        |
|                                 | Adducts AT-0          | 0.668         | 0.165         | 1.171         | 0.467        | 8.751         | 0.014        |
|                                 | <b>Adducts AT-1</b>   | <b>0.609</b>  | <b>0.312</b>  | <b>0.905</b>  | <b>0.676</b> | <b>20.902</b> | <b>0.001</b> |
|                                 | % Tail DNA AT-0       | -5.512        | -18.037       | 7.014         | 0.088        | 0.961         | 0.350        |
|                                 | % Tail DNA AT-1       | 1.410         | -10.540       | 13.361        | 0.007        | 0.069         | 0.798        |
|                                 | % G1 phase cells      | 0.309         | -0.309        | 0.928         | 0.110        | 1.241         | 0.291        |
|                                 | % S phase cells       | -0.086        | -0.0996       | 0.824         | 0.004        | 0.045         | 0.837        |
|                                 | % G2 phase cells      | -0.355        | -1.073        | 0.362         | 0.109        | 1.218         | 0.296        |
| <b>C.- OVARIAN CELL LINES</b>   |                       |               |               |               |              |               |              |
| Viability                       | Concentration         | -0.937        | -3.037        | 1.163         | 0.116        | 1.192         | 0.317        |

|           |                       |               |               |               |              |               |              |
|-----------|-----------------------|---------------|---------------|---------------|--------------|---------------|--------------|
|           | Intracellular Pt AT-0 | -1.245        | -1.751        | -0.740        | 0.858        | 36.317        | 0.001        |
|           | Intracellular Pt AT-1 | -3,507        | -5.873        | -1.141        | 0.687        | 13.158        | 0.011        |
|           | Adducts AT-0          | -1.375        | -2.136        | -0.614        | 0.765        | 19.532        | 0.004        |
|           | <b>Adducts AT-1</b>   | <b>-1.340</b> | <b>-1.837</b> | <b>-0.844</b> | <b>0.879</b> | <b>43.662</b> | <b>0.001</b> |
|           | % Tail DNA AT-0       | -11.094       | -26.651       | 4.464         | 0.337        | 3.045         | 0.132        |
|           | % Tail DNA AT-1       | -21.765       | -34.192       | -9.337        | 0.754        | 18.365        | 0.005        |
|           | % G1 phase cells      | 0.616         | -0.217        | 1.450         | 0.353        | 3.271         | 0.121        |
|           | % S phase cells       | -0.614        | -1.608        | 0.381         | 0.275        | 2.280         | 0.182        |
|           | % G2 phase cells      | -0.220        | -1.534        | 1.093         | 0.027        | 0.168         | 0.696        |
| Apoptosis | Concentration         | 0.161         | -0.258        | 0.579         | 0.128        | 0.882         | 0.384        |
|           | Intracellular Pt AT-0 | 0.230         | 0.106         | 0.355         | 0.773        | 20.405        | 0.004        |
|           | Intracellular Pt AT-1 | 0.637         | 0.113         | 1.160         | 0.596        | 8.859         | 0.025        |
|           | Adducts AT-0          | 0.251         | 0.077         | 0.426         | 0.674        | 12.409        | 0.012        |
|           | <b>Adducts AT-1</b>   | <b>0.247</b>  | <b>0.119</b>  | <b>0.375</b>  | <b>0.788</b> | <b>22.323</b> | <b>0.003</b> |
|           | % Tail DNA AT-0       | 2.574         | -0.116        | 5.264         | 0.477        | 5.482         | 0.058        |
|           | % Tail DNA AT-1       | 4.320         | 2.044         | 6.596         | 0.782        | 21.564        | 0.004        |
|           | % G1 phase cells      | -0.113        | -0.280        | 0.054         | 0.315        | 2.759         | 0.148        |
|           | % S phase cells       | 0.099         | -0.106        | 0.304         | 0.187        | 1.384         | 0.284        |
|           | % G2 phase cells      | 0.059         | -0.194        | 0.312         | 0.052        | 0.328         | 0.588        |

Supplementary Table 2. Prediction analysis. Multivariate regression data with viability and apoptosis as dependent variables, adducts AT-1 as first independent variable and %Tail DNA AT-1, intracellular Pt AT-0, G1 cells or S cells, as second variable.

| <b>A.-ALL CELL LINES</b>           |                              |               |                      |               |                |               |               |
|------------------------------------|------------------------------|---------------|----------------------|---------------|----------------|---------------|---------------|
| Model                              |                              | B Slope       | Confidence intervals |               | R <sup>2</sup> | F Anova       | p-value Anova |
| dependent vs independent variables |                              |               | 95%                  |               |                |               |               |
| <b>Dependent variable</b>          | <b>Independent variables</b> |               |                      |               |                |               |               |
| Viability                          | <b>Adducts-AT-1</b>          | <b>-0.624</b> | <b>-0.840</b>        | <b>-0.408</b> | <b>0.733</b>   | <b>38.356</b> | <b>0.000</b>  |
|                                    | Adducts-AT-1                 | -0.564        | -0.768               | -0.360        | 0.802          | 26.253        | 0.000         |
|                                    | %Tail-DNA-AT-1               | -4.803        | -9.685               | 0.079         |                |               |               |
|                                    | Adducts-AT-1                 | -0.405        | -0.570               | -0.239        | 0.906          | 62.456        | 0.000         |
|                                    | Intracellular-Pt-AT-0        | -0.826        | -1.191               | -0.461        |                |               |               |
|                                    | Adducts-AT-1                 | -0.608        | -0.825               | -0.391        | 0.758          | 20.394        | 0.000         |
|                                    | G1 cells                     | 0.145         | -0.121               | 0.412         |                |               |               |
|                                    | Adducts-AT-1                 | -0.599        | -0.811               | -0.387        | 0.771          | 21.869        | 0.000         |
|                                    | S cells                      | -0.267        | -0.658               | 0.124         |                |               |               |
| Apoptosis                          | <b>Adducts-AT-1</b>          | <b>0.600</b>  | <b>0.373</b>         | <b>0.827</b>  | <b>0.697</b>   | <b>32.139</b> | <b>0.000</b>  |
|                                    | Adducts-AT-1                 | 0.633         | 0.394                | 0.873         | 0.718          | 16.578        | 0.000         |
|                                    | %Tail-DNA-AT-1               | -2.663        | -8.402               | 3.075         |                |               |               |
|                                    | Adducts-AT-1                 | 0.745         | 0.492                | 0.998         | 0.774          | 22.252        | 0.000         |
|                                    | Intracellular-Pt-AT-0        | -0.545        | -1.103               | 0.013         |                |               |               |
|                                    | Adducts-AT-1                 | 0.643         | 0.493                | 0.792         | 0.882          | 48.668        | 0.000         |
|                                    | G1 cells                     | 0.385         | 0.201                | 0.568         |                |               |               |
|                                    | Adducts-AT-1                 | 0.622         | 0.394                | 0.850         | 0.728          | 17.379        | 0.000         |

|                                      |                       |               |               |               |              |               |              |
|--------------------------------------|-----------------------|---------------|---------------|---------------|--------------|---------------|--------------|
|                                      | S cells               | -0.238        | -0.659        | 0.183         |              |               |              |
| <b>B.- SENSITIVE CELL LINES</b>      |                       |               |               |               |              |               |              |
| Viability                            | <b>Adducts-AT-1</b>   | <b>-0.561</b> | <b>-0.802</b> | <b>-0.320</b> | <b>0.729</b> | <b>26.900</b> | <b>0.000</b> |
|                                      | Adducts-AT-1          | -0.496        | -0.718        | -0.274        | 0.820        | 20.451        | 0.000        |
|                                      | %Tail-DNA-AT-1        | -4.796        | -9.897        | 0.305         |              |               |              |
|                                      | Adducts-AT-1          | -0.376        | -0.525        | -0.228        | 0.935        | 64.840        | 0.000        |
|                                      | Intracellular-Pt-AT-0 | -0.768        | -1.092        | -0.443        |              |               |              |
|                                      | Adducts-AT-1          | -0.529        | -0.737        | -0.321        | 0.828        | 21.672        | 0.000        |
|                                      | G1 cells              | 0.263         | 0.002         | 0.525         |              |               |              |
|                                      | Adducts-AT-1          | -0.541        | -0.771        | -0.310        | 0.787        | 16.634        | 0.001        |
|                                      | S cells               | -0.280        | -0.683        | 0.124         |              |               |              |
| Apoptosis                            | <b>Adducts-AT-1</b>   | <b>0.609</b>  | <b>0.312</b>  | <b>0.905</b>  | <b>0.676</b> | <b>20.902</b> | <b>0.001</b> |
|                                      | Adducts-AT-1          | 0.654         | 0.338         | 0.970         | 0.711        | 11.046        | 0.004        |
|                                      | %Tail-DNA-AT-1        | -3.312        | -10.584       | 3.961         |              |               |              |
|                                      | Adducts-AT-1          | 0.743         | 0.424         | 1.063         | 0.763        | 14.485        | 0.002        |
|                                      | Intracellular-Pt-AT-0 | -0.560        | -1.258        | 0.139         |              |               |              |
|                                      | Adducts-AT-1          | 0.663         | 0.479         | 0.847         | 0.894        | 37.864        | 0.000        |
|                                      | G1 cells              | 0.439         | 0.208         | 0.671         |              |               |              |
|                                      | Adducts-AT-1          | 0.625         | 0.321         | 0.930         | 0.707        | 10.860        | 0.004        |
|                                      | S cells               | -0.229        | -0.761        | 0.304         |              |               |              |
| <b>C.- OVARIAN CANCER CELL LINES</b> |                       |               |               |               |              |               |              |
| Viability                            | <b>Adducts-AT-1</b>   | <b>-1.340</b> | <b>-1.837</b> | <b>-0.844</b> | <b>0.879</b> | <b>43.662</b> | <b>0.001</b> |
|                                      | Adducts-AT-1          | -0.931        | -1.481        | -0.382        | 0.949        | 46.213        | 0.001        |
|                                      | %Tail-DNA-AT-1        | -9.753        | -19.388       | -0.118        |              |               |              |
|                                      | Adducts-AT-1          | -0.836        | -2.502        | 0.831         | 0.894        | 20.990        | 0.004        |

|           |                       |              |              |              |              |               |              |
|-----------|-----------------------|--------------|--------------|--------------|--------------|---------------|--------------|
|           | Intracellular-Pt-AT-0 | -0.501       | -2.069       | 1.066        |              |               |              |
|           | Adducts-AT-1          | -1.993       | -2.422       | -1.563       | 0.978        | 111.239       | 0.000        |
|           | G1 cells              | -0.575       | -0.887       | -0.263       |              |               |              |
|           | Adducts-AT-1          | -1.480       | -2.191       | -0.768       | 0.892        | 20.666        | 0.004        |
|           | S cells               | 0.175        | -0.407       | 0.757        |              |               |              |
| Apoptosis | <b>Adducts-AT-1</b>   | <b>0.247</b> | <b>0.119</b> | <b>0.375</b> | <b>0.788</b> | <b>22.323</b> | <b>0.003</b> |
|           | Adducts-AT-1          | 0.144        | -0.002       | 0.290        | 0.905        | 23.813        | 0.003        |
|           | %Tail-DNA-AT-1        | 2.463        | 0.090        | 5.017        |              |               |              |
|           | Adducts-AT-1          | 0.149        | -0.293       | 0.591        | 0.802        | 10.156        | 0.017        |
|           | Intracellular-Pt-AT-0 | 0.097        | -0.319       | 0.513        |              |               |              |
|           | Adducts-AT-1          | 0.368        | 0.171        | 0.566        | 0.878        | 17.992        | 0.005        |
|           | G1 cells              | 0.107        | -0.036       | 0.250        |              |               |              |
|           | Adducts-AT-1          | 0.293        | 0.117        | 0.470        | 0.825        | 11.780        | 0.013        |
|           | S cells               | -0.058       | -0.202       | 0.087        |              |               |              |

Table 3. Prediction analysis. Multivariate regression data with viability and apoptosis as dependent variables, and adducts AT-1, intracellular Pt AT-0, %Tail DNA AT-1 and percentage of G1 cells as independent ones. Comparison with the univariate regressions with adducts AT-1 as independent variable.

| <b>A.-ALL CELL LINES</b>           |                              |               |                      |               |                |               |               |
|------------------------------------|------------------------------|---------------|----------------------|---------------|----------------|---------------|---------------|
| Model                              |                              | B Slope       | Confidence intervals |               | R <sup>2</sup> | F Anova       | p-value Anova |
| dependent vs independent variables |                              |               | 95%                  |               |                |               |               |
| <b>Dependent variable</b>          | <b>Independent variables</b> |               |                      |               |                |               |               |
| Viability                          | <b>Adducts AT-1</b>          | <b>-0.624</b> | <b>-0.840</b>        | <b>-0.408</b> | <b>0.733</b>   | <b>38.356</b> | <b>0.000</b>  |
|                                    | Adducts AT-1                 | -0.351        | -0.510               | -0.193        | 0.938          | 41.600        | 0.000         |
|                                    | Intracellular Pt AT-0        | -1.016        | -1.472               | -0.560        |                |               |               |
|                                    | %Tail DNA AT-1               | -2.124        | -5.806               | 1.558         |                |               |               |
|                                    | G1 cells                     | -0.215        | -0.421               | -0.008        |                |               |               |
| Apoptosis                          | <b>Adducts AT-1</b>          | <b>0.600</b>  | <b>0.373</b>         | <b>0.827</b>  | <b>0.697</b>   | <b>32.139</b> | <b>0.000</b>  |
|                                    | Adducts AT-1                 | 0.635         | 0.427                | 0.843         | 0.890          | 22.253        | 0.000         |
|                                    | Intracellular Pt AT-0        | -0.047        | -0.646               | 0.552         |                |               |               |
|                                    | %Tail DNA AT-1               | 1.937         | -2.901               | 6.775         |                |               |               |
|                                    | G1 cells                     | 0.420         | 0.149                | 0.691         |                |               |               |
| <b>B.- SENSITIVE CELL LINES</b>    |                              |               |                      |               |                |               |               |
| Viability                          | <b>Adducts AT-1</b>          | <b>-0.561</b> | <b>-0.802</b>        | <b>-0.320</b> | <b>0.729</b>   | <b>26.900</b> | <b>0.000</b>  |
|                                    | Adducts AT-1                 | -0.348        | -0.525               | -0.171        | 0.945          | 30.301        | 0.000         |
|                                    | Intracellular Pt AT-0        | -0.837        | -1.382               | -0.291        |                |               |               |
|                                    | %Tail DNA AT-1               | -1.940        | -6.434               | 2.553         |                |               |               |
|                                    | G1 cells                     | -0.119        | -0.422               | 0.183         |                |               |               |
| Apoptosis                          | <b>Adducts AT-1</b>          | <b>0.609</b>  | <b>0.312</b>         | <b>0.905</b>  | <b>0.676</b>   | <b>20.902</b> | <b>0.001</b>  |

|                               |                       |               |               |               |              |               |              |
|-------------------------------|-----------------------|---------------|---------------|---------------|--------------|---------------|--------------|
|                               | Adducts AT-1          | 0.583         | 0.355         | 0.811         |              |               |              |
|                               | Intracellular Pt AT-0 | 0.224         | -0.478        | 0.926         | 0.929        | 22.784        | 0.000        |
|                               | %Tail DNA AT-1        | 3.931         | -1.849        | 9.711         |              |               |              |
|                               | G1 cells              | 0.662         | 0.273         | 1.050         |              |               |              |
| <b>C.- OVARIAN CELL LINES</b> |                       |               |               |               |              |               |              |
| Viability                     | <b>Adducts AT-1</b>   | <b>-1.340</b> | <b>-1.837</b> | <b>-0.844</b> | <b>0.879</b> | <b>43.662</b> | <b>0.001</b> |
|                               | Adducts AT-1          | -1.584        | -2.165        | -1.004        |              |               |              |
|                               | Intracellular Pt AT-0 | -0.033        | -0.524        | 0.457         | 0.997        | 222.87        | 0.000        |
|                               | %Tail DNA AT-1        | -5.530        | -10.299       | -0.760        |              | 8             |              |
|                               | G1 cells              | -0.449        | -0.667        | -0.230        |              |               |              |
| Apoptosis                     | <b>Adducts AT-1</b>   | <b>0.247</b>  | <b>0.119</b>  | <b>0.375</b>  | <b>0.788</b> | <b>22.323</b> | <b>0.003</b> |
|                               | Adducts AT-1          | 0.265         | -0.243        | 0.773         |              |               |              |
|                               | Intracellular Pt AT-0 | -0.026        | -0.455        | 0.403         | 0.932        | 10.338        | 0.042        |
|                               | %Tail DNA AT-1        | 1.965         | -2.208        | 6.138         |              |               |              |
|                               | G1 cells              | 0.065         | -0.126        | 0.256         |              |               |              |



Supplementary Table 4. Pearson correlation coefficients and their statistical signification for all the analysed variables, considering the three data groups.

| ALL CELL LINES        | Apoptosis | Intracellular Pt AT-0 | Intracellular Pt AT-1 | Pt G-G/AT-0 | Pt G-G/AT-1 | %Tail DNA/AT-0 | %Tail DNA/AT-1    | % G1 phase cells | % S phase cells | % G2 phase cells  |
|-----------------------|-----------|-----------------------|-----------------------|-------------|-------------|----------------|-------------------|------------------|-----------------|-------------------|
| Cell viability        | - 0.66**  | - 0.84***             | - 0.78***             | - 0.85***   | - 0.86***   | - 0.19         | - 0.51*           | 0.28             | - 0.34          | - 0.06            |
| Apoptosis             |           | 0.26                  | 0.26                  | 0.71**      | 0.84***     | - 0.16         | 0.11              | 0.31             | - 0.03          | - 0.34            |
| Intracellular Pt AT-0 |           |                       | 0.96***               | 0.67**      | 0.59*       | 0.39           | 0.58*             | - 0.61*          | 0.62*           | 0.23              |
| Intracellular Pt AT-1 |           |                       |                       | 0.71**      | 0.61*       | 0.26           | 0.57*             | - 0.73**         | 0.68**          | 0.33              |
| Pt G-G/AT-0           |           |                       |                       |             | 0.96***     | 0.03           | 0.38              | - 0.31           | 0.33            | 0.10              |
| Pt G-G/AT-1           |           |                       |                       |             |             | - 0.07         | 0.30              | - 0.14           | 0.17            | 0.03              |
| % Tail DNA/AT-0       |           |                       |                       |             |             |                | 0.42 <sup>a</sup> | - 0.12           | - 0.01          | 0.15              |
| % Tail DNA/AT-1       |           |                       |                       |             |             |                |                   | - 0.53*          | 0.26            | 0.42 <sup>a</sup> |
| % G1 phase cells      |           |                       |                       |             |             |                |                   |                  | - 0.54*         | - 0.75**          |

|                       |         |            |            |            |                   |        |                     |          |        |                   |
|-----------------------|---------|------------|------------|------------|-------------------|--------|---------------------|----------|--------|-------------------|
| % S phase cells       |         |            |            |            |                   |        |                     |          |        | - 0.15            |
| % G2 phase cell       |         |            |            |            |                   |        |                     |          |        |                   |
|                       |         |            |            |            |                   |        |                     |          |        |                   |
| SENSITIVE CELL LINES  |         |            |            |            |                   |        |                     |          |        |                   |
| Cell viability        | - 0.63* | - 0.84**** | - 0.85**** | - 0.86**** | - 0.85****        | - 0.06 | - 0.55 <sup>a</sup> | 0.44     | - 0.35 | - 0.22            |
| Apoptosis             |         | 0.18       | 0.22       | 0.68*      | 0.82**            | - 0.30 | 0.08                | 0.33     | - 0.07 | - 0.33            |
| Intracellular Pt AT-0 |         |            | 0.99****   | 0.63*      | 0.53 <sup>a</sup> | 0.37   | 0.61*               | - 0.72** | 0.62*  | 0.32              |
| Intracellular Pt AT-1 |         |            |            | 0.69*      | 0.58*             | 0.30   | 0.65*               | - 0.75** | 0.66*  | 0.32              |
| Pt G-G/AT-0           |         |            |            |            | 0.95****          | - 0.07 | 0.40                | - 0.35   | 0.31   | 0.15              |
| Pt G-G/AT-1           |         |            |            |            |                   | - 0.17 | 0.31                | - 0.16   | 0.13   | 0.07              |
| % Tail DNA/AT-0       |         |            |            |            |                   |        | 0.36                | - 0.26   | - 0.01 | 0.31              |
| % Tail DNA/AT-1       |         |            |            |            |                   |        |                     | - 0.68*  | 0.29   | 0.54 <sup>a</sup> |

|                       |           |          |         |          |           |                   |                   |          |                     |          |
|-----------------------|-----------|----------|---------|----------|-----------|-------------------|-------------------|----------|---------------------|----------|
| % G1 phase cells      |           |          |         |          |           |                   |                   |          | - 0.54 <sup>a</sup> | - 0.71** |
| % S phase cells       |           |          |         |          |           |                   |                   |          |                     | - 0.21   |
| % G2 phase cell       |           |          |         |          |           |                   |                   |          |                     |          |
|                       |           |          |         |          |           |                   |                   |          |                     |          |
| OVARIAN CELL LINES    |           |          |         |          |           |                   |                   |          |                     |          |
| Cell viability        | - 0.97*** | - 0.93** | - 0.83* | - 0.87** | - 0.94*** | - 0.58            | - 0.87**          | 0.59     | - 0.52              | - 0.17   |
| Apoptosis             |           | 0.88**   | 0.77*   | 0.82*    | 0.89**    | 0.69 <sup>a</sup> | 0.88**            | - 0.56   | 0.43                | 0.23     |
| Intracellular Pt AT-0 |           |          | 0.96*** | 0.98***  | 0.95***   | 0.56              | 0.79*             | - 0.74*  | 0.78*               | 0.06     |
| Intracellular Pt AT-1 |           |          |         | 0.99***  | 0.94***   | 0.39              | 0.64 <sup>a</sup> | - 0.89** | 0.85**              | 0.17     |
| Pt G-G/AT-0           |           |          |         |          | 0.96***   | 0.46              | 0.71*             | - 0.85** | 0.82*               | 0.16     |
| Pt G-G/AT-1           |           |          |         |          |           | 0.39              | 0.74*             | - 0.82*  | 0.65 <sup>a</sup>   | 0.32     |
| % Tail DNA/AT-0       |           |          |         |          |           |                   | 0.70*             | - 0.09   | 0.33                | - 0.26   |

|                     |  |  |  |  |  |  |  |  |        |                     |        |
|---------------------|--|--|--|--|--|--|--|--|--------|---------------------|--------|
| % Tail<br>DNA/AT-1  |  |  |  |  |  |  |  |  | - 0.43 | 0.34                | 0.17   |
| % G1 phase<br>cells |  |  |  |  |  |  |  |  |        | - 0.67 <sup>a</sup> | - 0.53 |
| % S phase cells     |  |  |  |  |  |  |  |  |        |                     | - 0.28 |
| % G2 phase<br>cell  |  |  |  |  |  |  |  |  |        |                     |        |

\*p< 0.05; \*\*p< 0.01; \*\*\*p< 0.001; <sup>a</sup> p< 0.05 considering one tail.
